# Supplementary material
Source: PubMed Central journal article supplement (PMC4636941)

**A**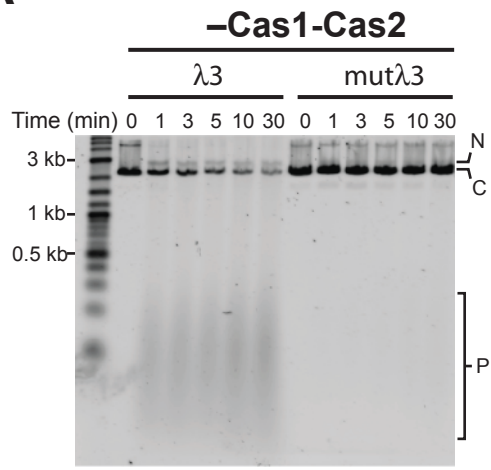**B**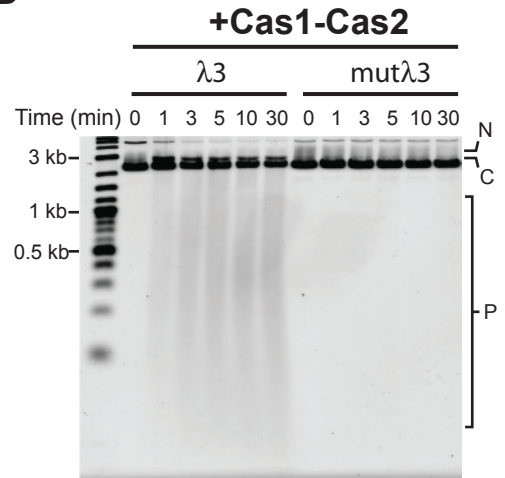**C**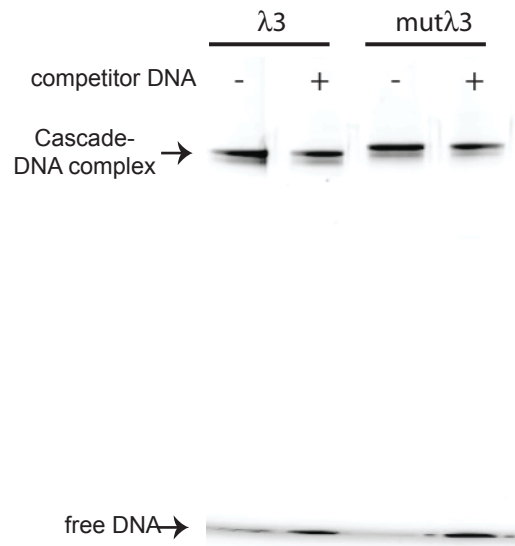

Supplement: NIHMS728626-supplement-10.pdf [file NIHMS728626-supplement-10.pdf]

**A**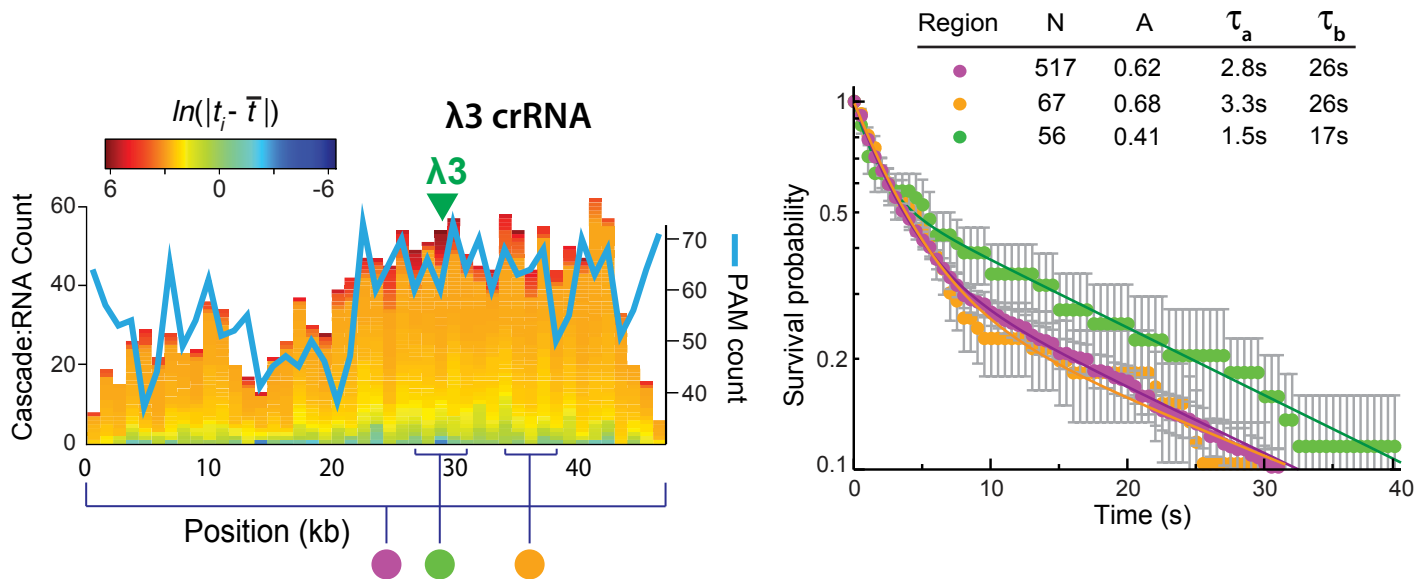**B**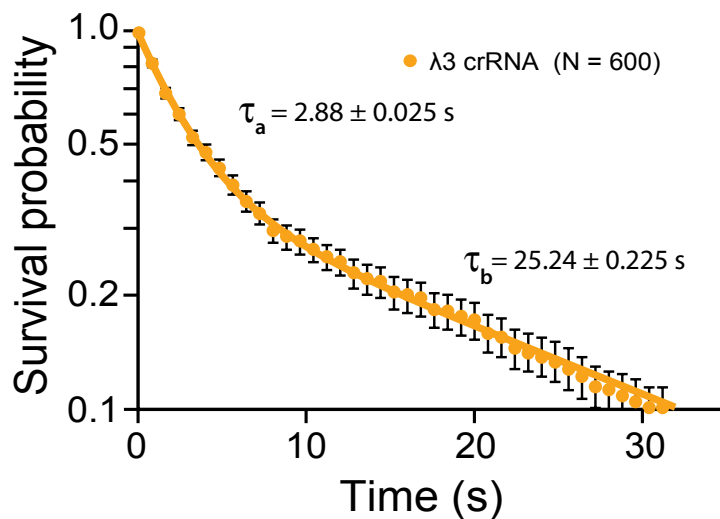**C**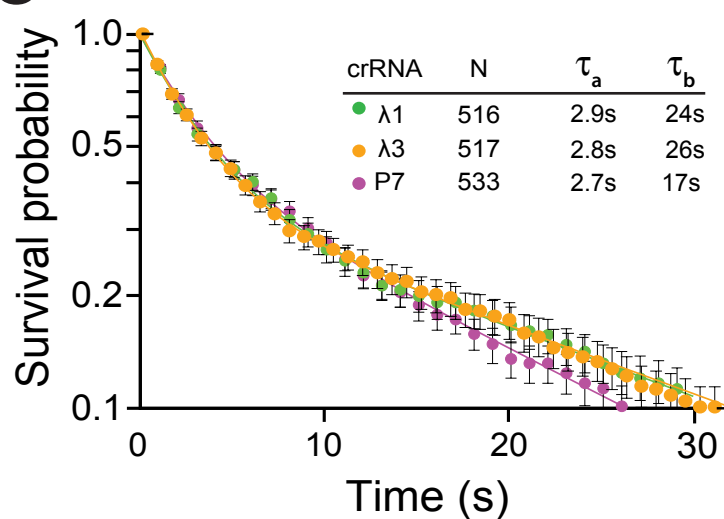**D**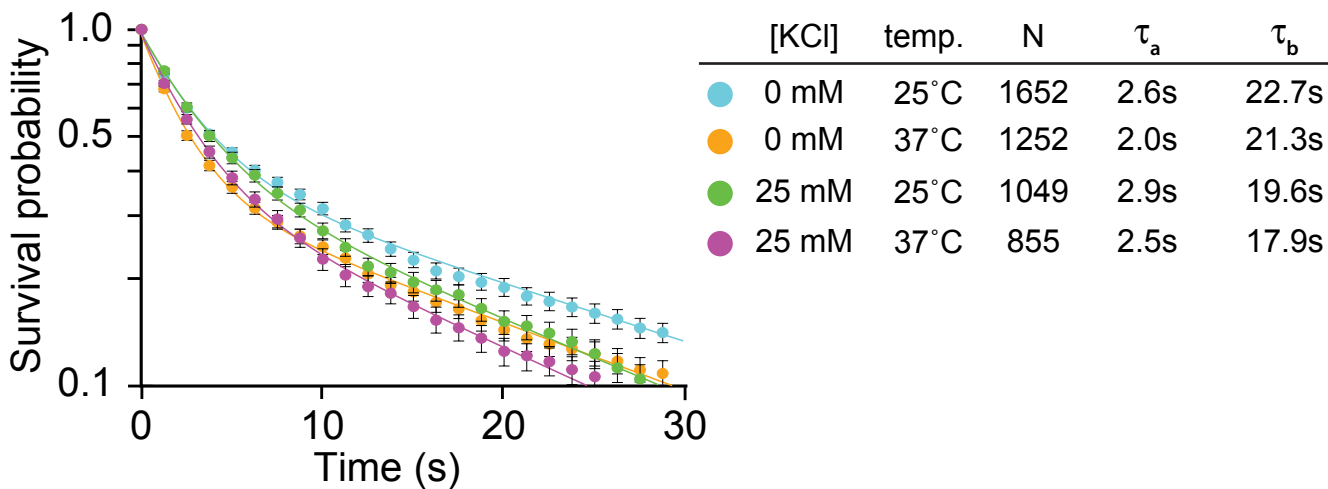

Supplement: NIHMS728626-supplement-5.pdf [file NIHMS728626-supplement-5.pdf]

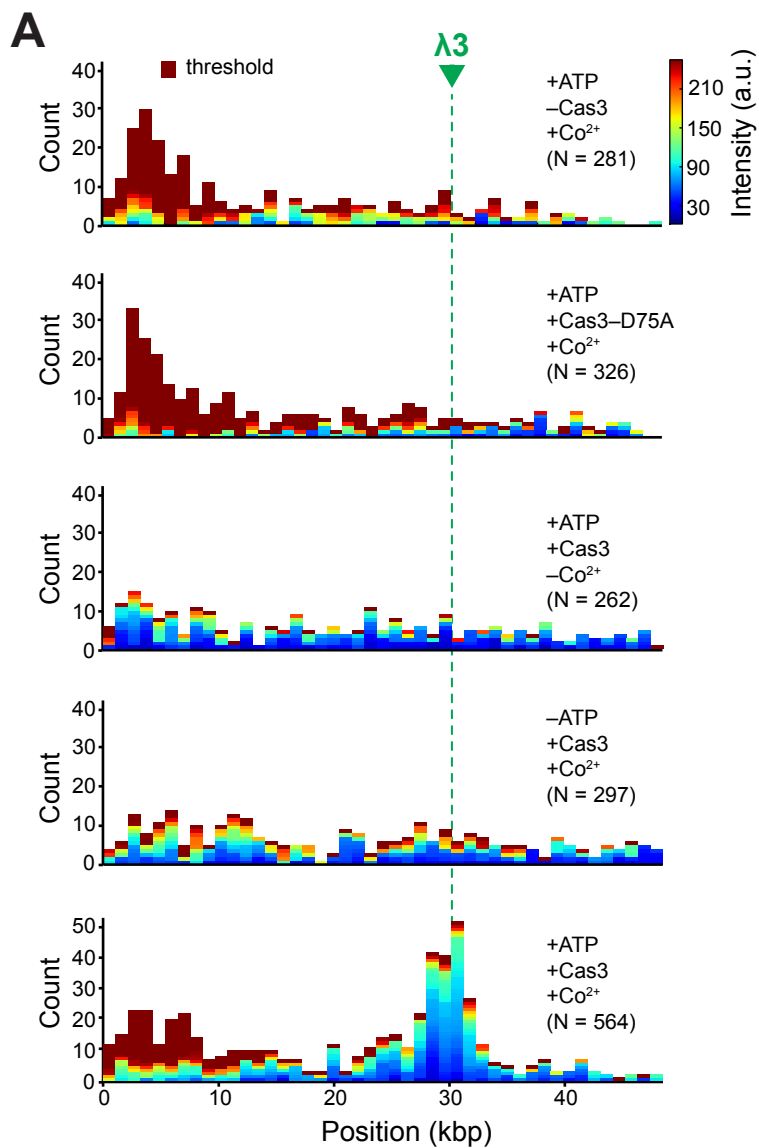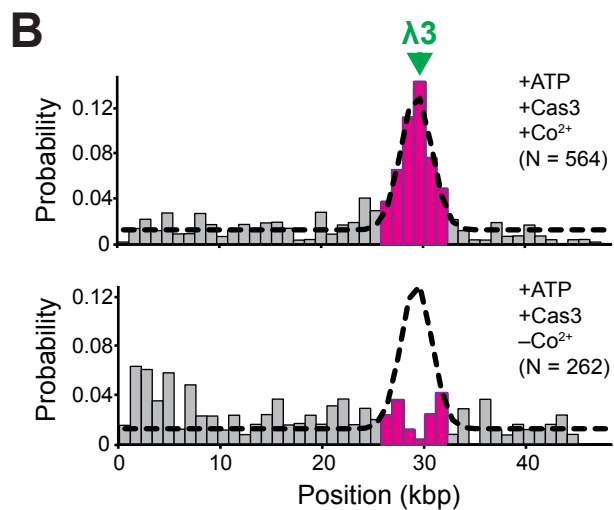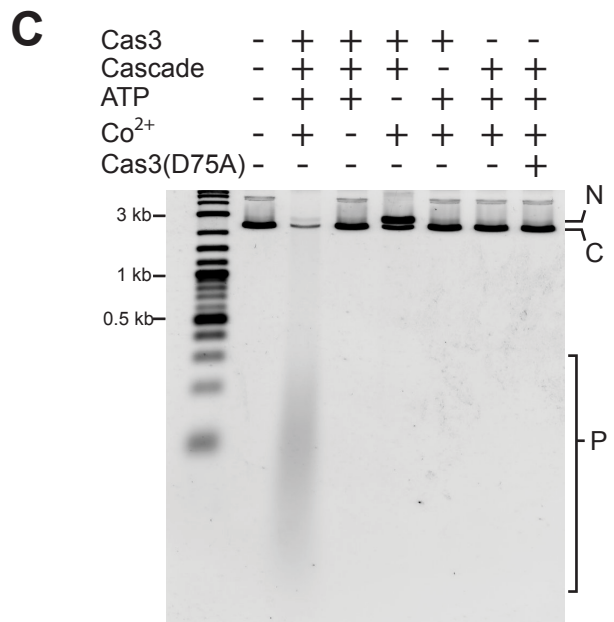

Supplement: NIHMS728626-supplement-6.pdf [file NIHMS728626-supplement-6.pdf]

**A**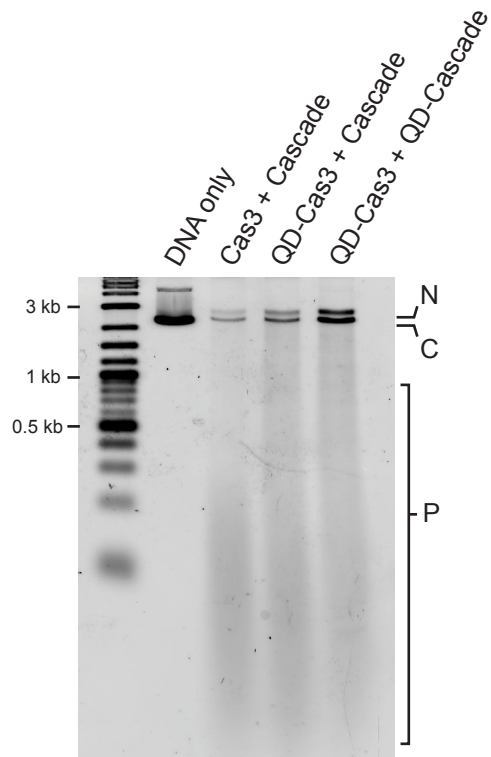**B**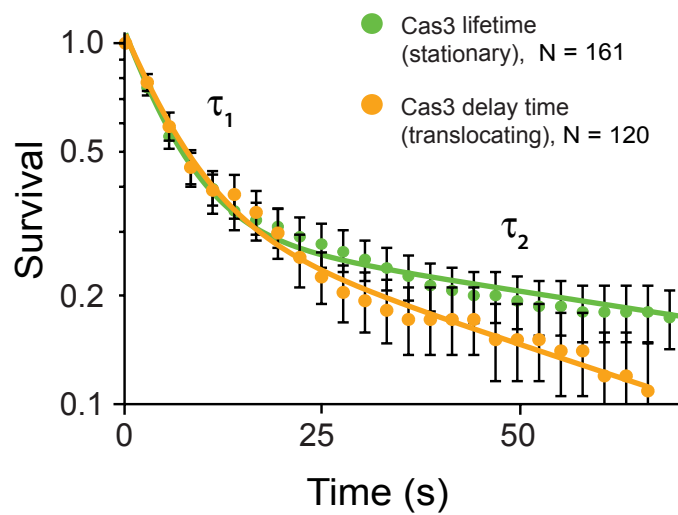**C**

|          | stationary lifetimes | translocating delay times |
|----------|----------------------|---------------------------|
| $\tau_1$ | $5.7 \pm 0.06$ s     | $6.45 \pm 0.13$ s         |
| $\tau_2$ | $133 \pm 1.42$ s     | $62.5 \pm 3.0$ s          |

**D**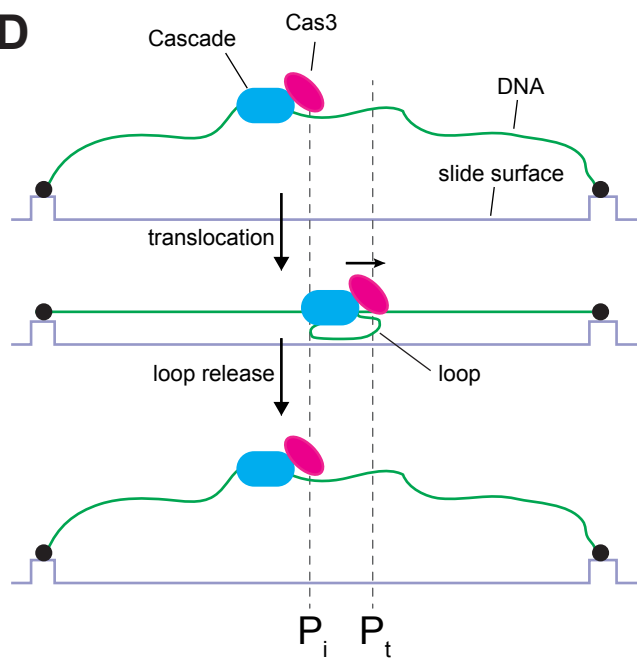

Supplement: NIHMS728626-supplement-7.pdf [file NIHMS728626-supplement-7.pdf]

**A**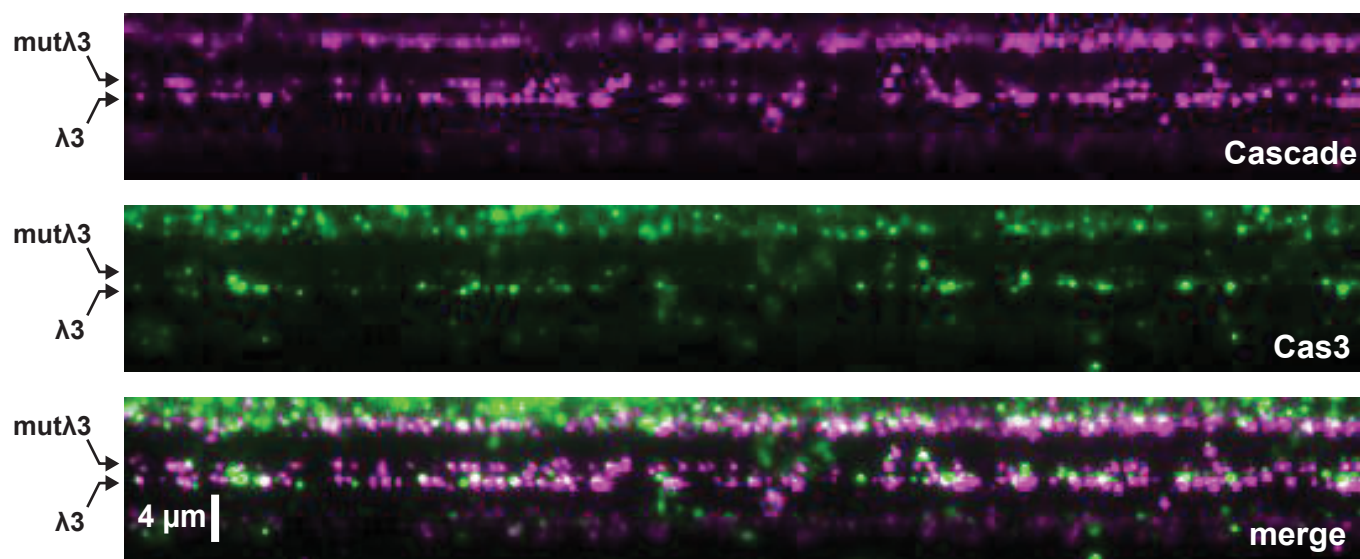**B**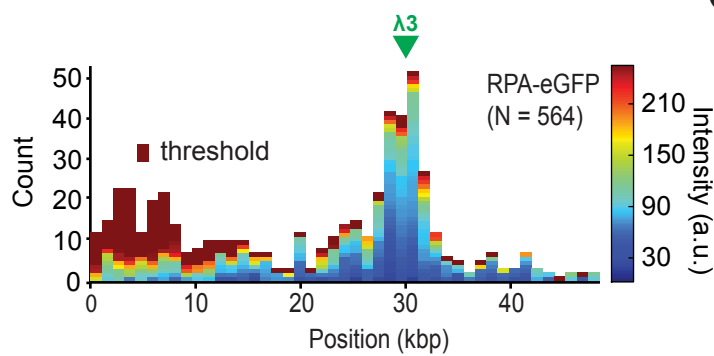**C**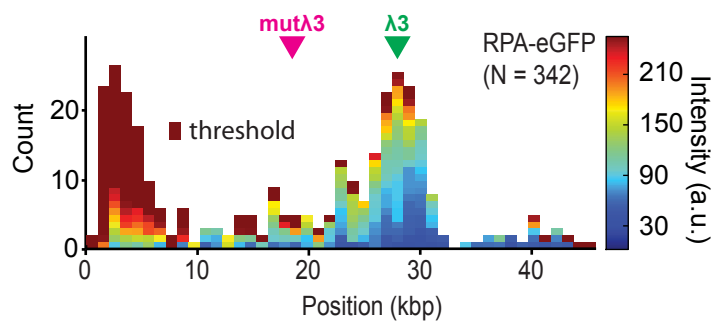**D**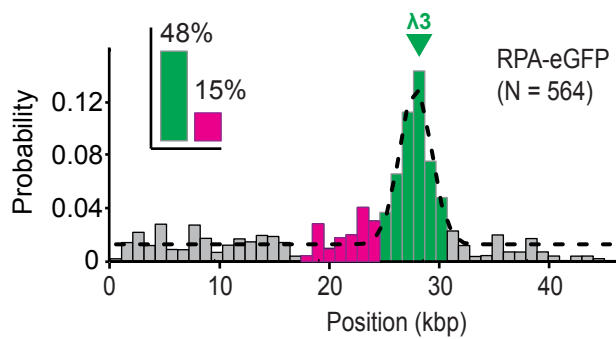**E**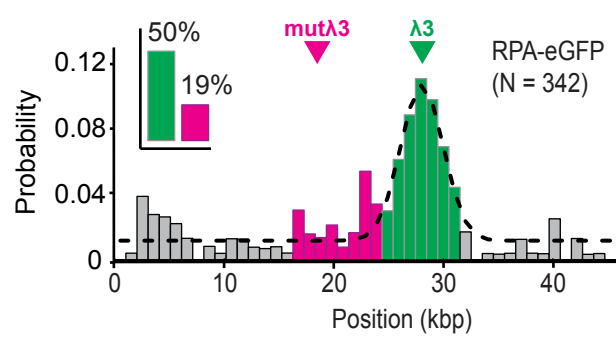

Supplement: NIHMS728626-supplement-8.pdf [file NIHMS728626-supplement-8.pdf]

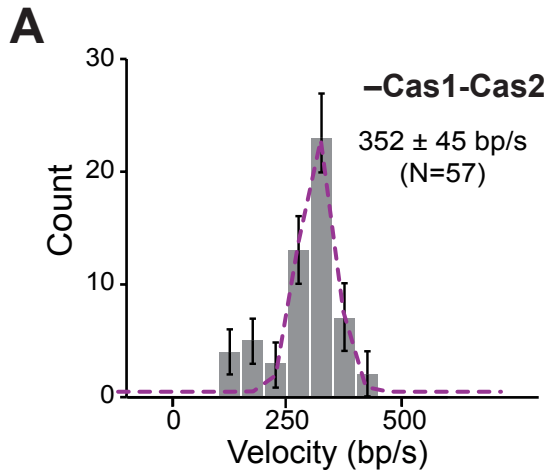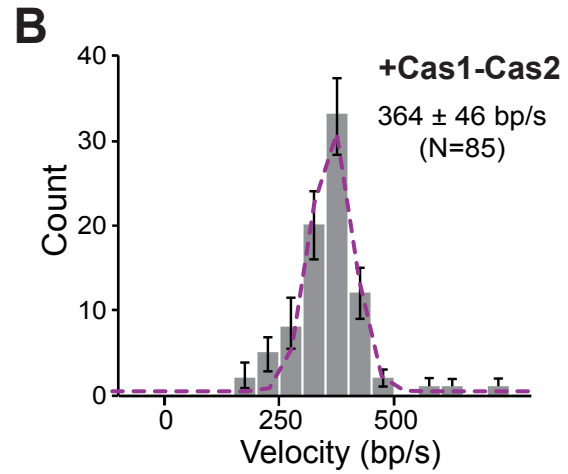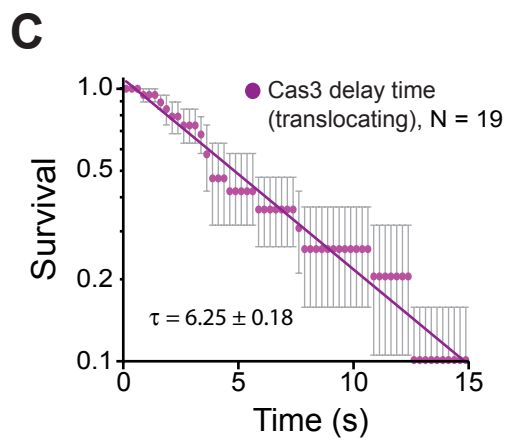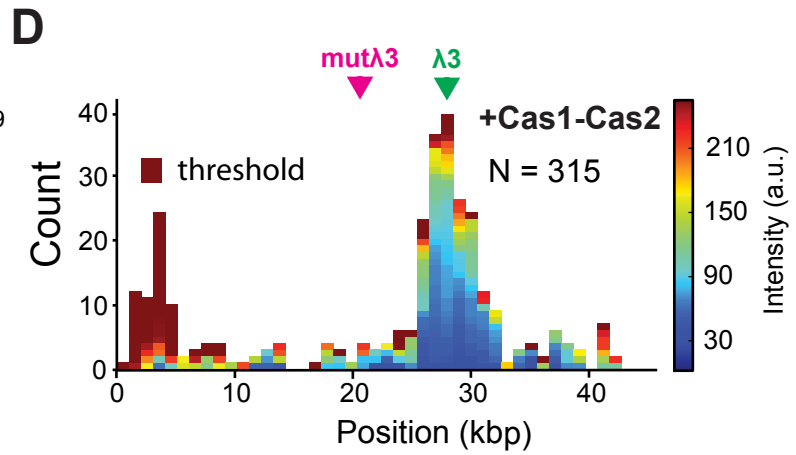

Supplement: NIHMS728626-supplement-9.pdf [file NIHMS728626-supplement-9.pdf]
